# Supplementary material for: The ketogenic diet is not feasible as a therapy in a CD-1 nu/nu mouse model of renal cell carcinoma with features of Stauffer's syndrome
Source: PubMed Central journal article supplement (PMC5593636; doi:10.18632/oncotarget.19306), 2017-07-17
Supplement: oncotarget-08-57201-s001.pdf [file oncotarget-08-57201-s001.pdf]

## The ketogenic diet is not feasible as a therapy in a CD-1 nu/nu mouse model of renal cell carcinoma with features of Stauffer's syndrome

### SUPPLEMENTARY MATERIALS

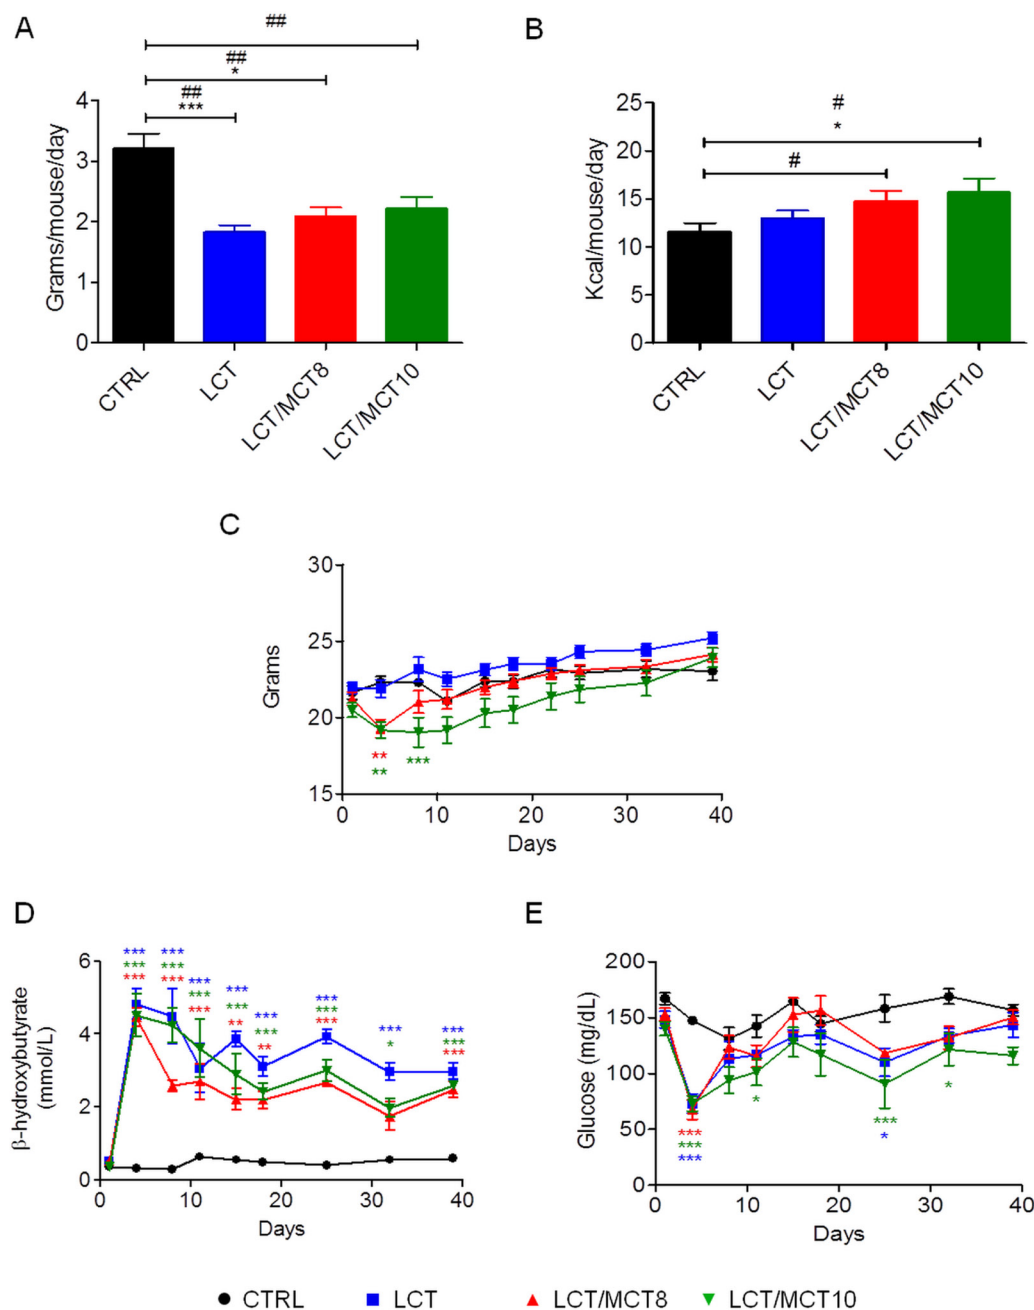

**Supplementary Figure 1: KD did not induce weight loss in healthy animals and stably increased blood ketone body levels.** (A) Average grams of food consumed per mouse per day. (B) Average daily calorie (Kcal) consumption of mice in different diet groups. Data are given as mean  $\pm$  SEM. Statistical analysis was performed by using the student's *t* test (unpaired samples) to compare two groups of dietary intervention,  $^{\#}p < 0.05$ ,  $^{\#\#}p < 0.01$  and one-way ANOVA (Kruskal-Wallis test) was performed to correct to multiple comparison,  $*p < 0.05$ ,  $^{***}p < 0.001$ ;  $n = 10$  measurements per diet group. (C) Average body weight variations in mice during dietary intervention. (D) Average blood ketone bodies (mmol/L) and (E) average blood glucose (mg/dL) levels. Data are given as mean  $\pm$  SEM. Statistical analysis was performed by using two-way ANOVA (Dunnett's multiple comparison test),  $*p < 0.05$ ,  $^{**}p < 0.01$ ,  $^{***}p < 0.001$ ;  $n = 6$ .

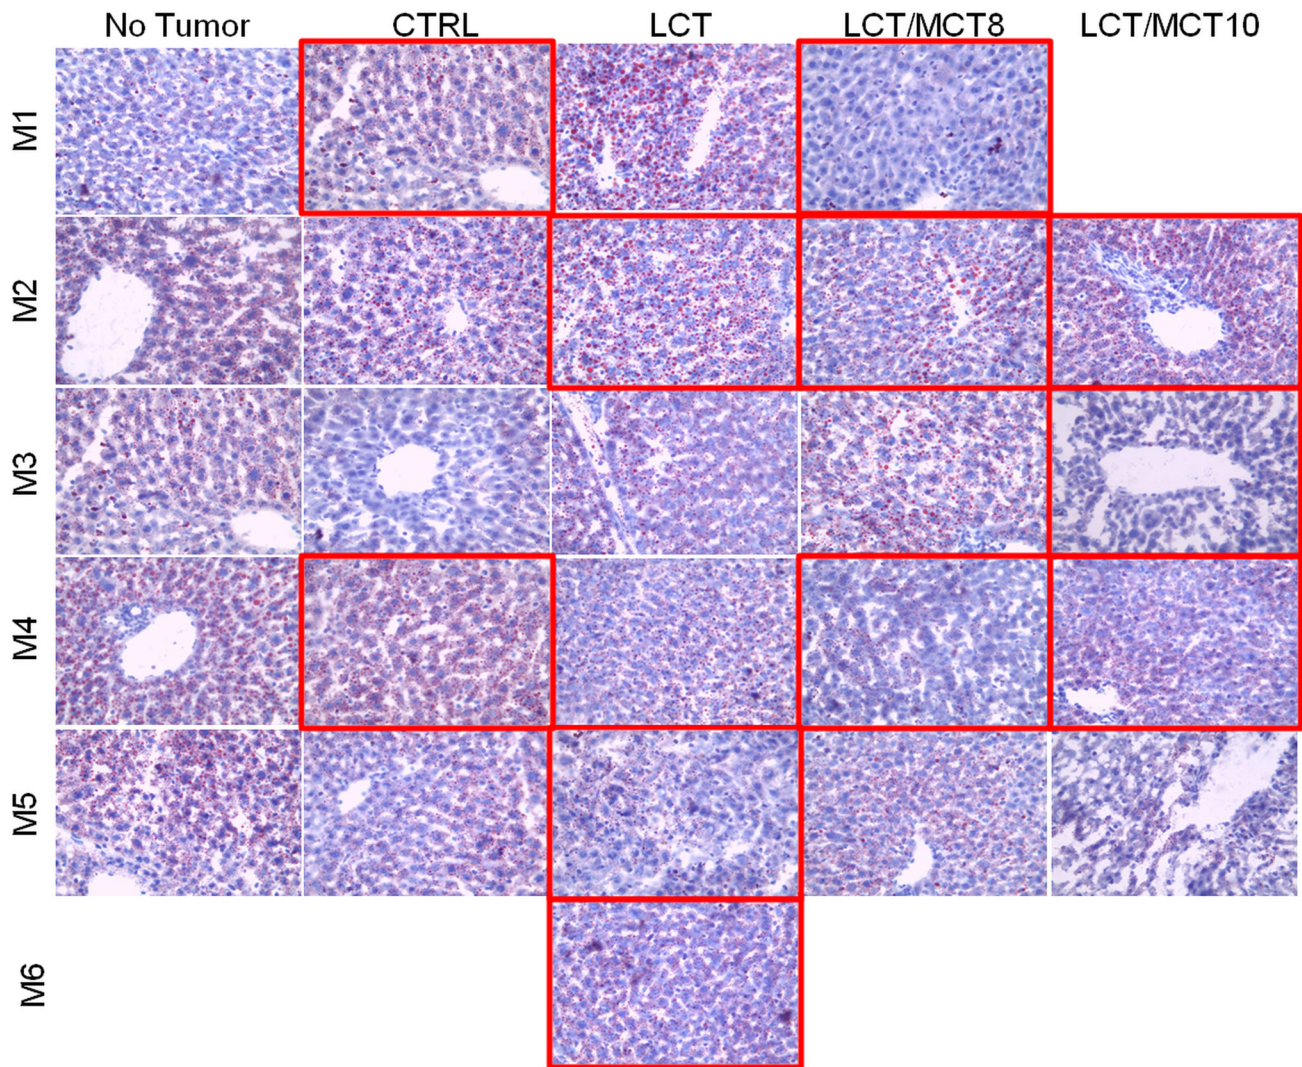

**Supplementary Figure 2: Fat droplets were not increased in RCC xenograft recipients treated with a KD.** Oil Red O staining for the detection of fat droplets on cryosections of mouse liver. The red frames indicate mice that experienced severe weight loss.
